# Supplementary material
Source: HighWire-hosted journal article supplement (https://erj.ersjournals.com/content/55/1/1902323)
Supplement: inline-supplementary-material-1 [file inline-supplementary-material-1.pdf]

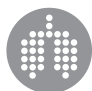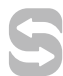

SHAREABLE PDF

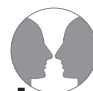

AGORA  
CORRESPONDENCE

# Should oral anticoagulation be discontinued after 3 months in the setting of a first high-risk pulmonary embolism secondary to a major transient/reversible risk factor?

Guy Meyer<sup>1</sup> and Stavros Konstantinides <sup>2,3</sup>

**Affiliations:** <sup>1</sup>Division of respiratory disease, APHP Centre; Université Paris Descartes; Université de Paris, Paris, France. <sup>2</sup>Center for Thrombosis and Haemostasis, University Medical Centre Mainz, Mainz, Germany. <sup>3</sup>Dept of Cardiology, Democritus University of Thrace, Alexandroupolis, Greece.

**Correspondence:** Guy Meyer, Service de Pneumologie, Hôpital Européen Georges Pompidou, 20 rue Leblanc, 75015 Paris, France. E-mail: [guy.meyer@aphp.fr](mailto:guy.meyer@aphp.fr)

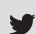

@ERSpublications

**For patients with first pulmonary embolism secondary to a major transient/reversible risk factor, discontinuation of therapeutic oral anticoagulation is recommended after 3 months**  
<http://bit.ly/2Pp68Ti>

**Cite this article as:** Meyer G, Konstantinides S. Should oral anticoagulation be discontinued after 3 months in the setting of a first high-risk pulmonary embolism secondary to a major transient/reversible risk factor?. *Eur Respir J* 2020; 55: 1902323 [<https://doi.org/10.1183/13993003.02323-2019>].

This single-page version can be shared freely online.

## *From the authors:*

We would like to thank H. Slabbynck and co-workers for their interest in the 2019 European Society of Cardiology/European Respiratory Society guidelines on the diagnosis and management of acute pulmonary embolism (PE), and for their interesting comment on the treatment duration of patients with a high-risk PE secondary to a major transient/reversible risk factor.
